# Supplementary material
Source: PubMed Central journal article supplement (PMC6909772)
Supplement: Supp_Data.pdf [file Supp_Data.pdf]

# **Proteomic Analysis and Biochemical Correlates of Mitochondrial Dysfunction following Low-Intensity Primary Blast Exposure**

## **Supplemental Information**

### **Supplemental Method**

#### **Fluorescence Immunohistochemistry and Quantitative Analyses**

The fluorescent staining and imaging process was followed as previously described<sup>1</sup>. Mouse brains were dissected and cut into serial coronal sections of 40- $\mu$ m thickness by a vibratome (VT1200S, Leica Microsystems, Inc., Bannockburn, IL) after transcardiac perfusion fixation with 4% paraformaldehyde. Fixed coronal sections were permeabilized with 1% Triton X-100 in phosphate-buffered saline (PBS) incubated with protein markers (MnSOD (ab13534 Abcam, 1:200); Drp1 (ab184247 Abcam, 1:500); Mitofusin 2 (cst9482 Cell Signaling Technology, 1:100)) overnight. Then, the sections were incubated with fluorophore-conjugated secondary antibodies (1:200, goat anti-rabbit IgG-Alexa488, A21441; Invitrogen, San Diego, CA), and then counter-stained with nuclear DNA dye Hoechst 33342 (1:1500). Fluorescence photomicrographs of the areas of interest were captured by a Leica DMI 6000B automated epifluorescence microscope (Leica Microsystems Inc., Buffalo Grove, IL). Stereological sections from bregma -1.70 to -1.94 mm, were used for quantification of MnSOD, Drp1, and Mitofusin2 expression levels in cerebral cortex regions. The region of interest was analyzed in a double blind manner using ImageJ software. Sections from all mice in different groups were stained in a single batch. The mean percentage of the area for each region from each mouse was compiled for statistical analysis.

## Supplemental Figures and Figure Legends

### Supplemental Figure S1. Low-intensity blast induced alterations of protein expressions at different time points.

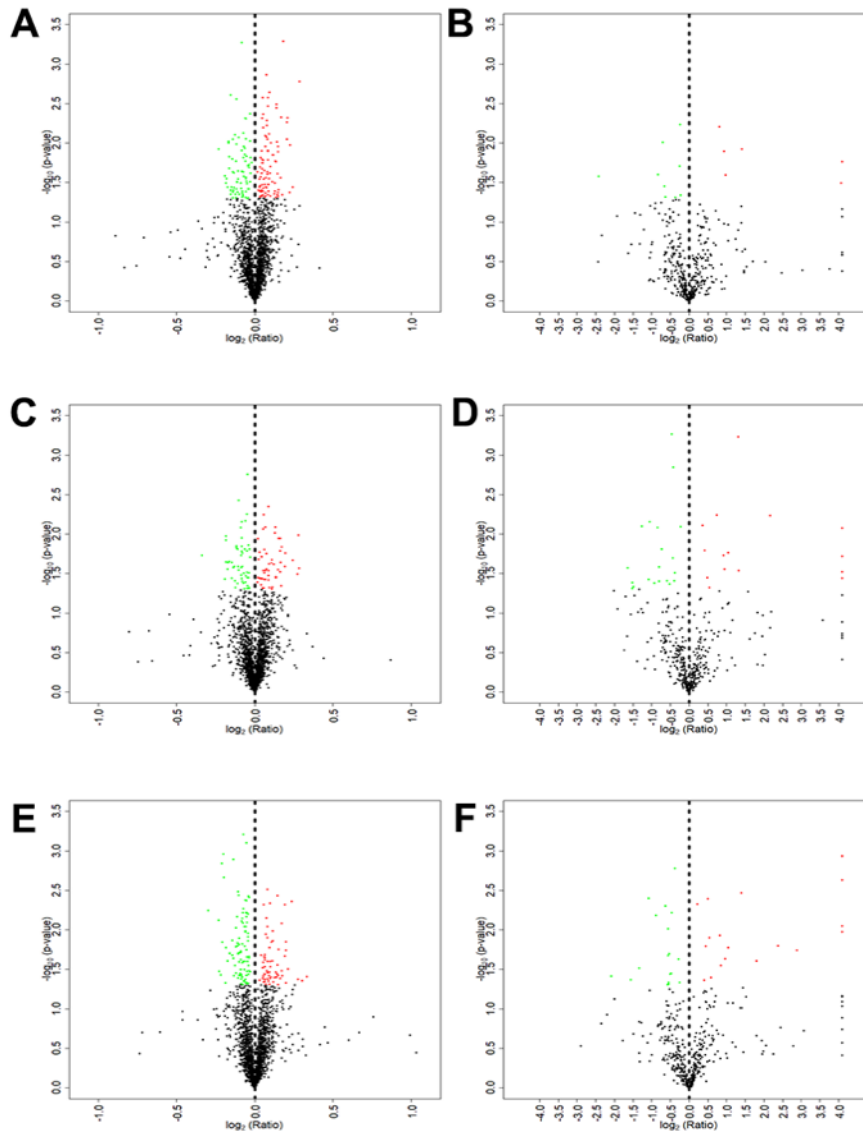

(A-B) Statistically differential expression of 182 global-proteins (A) and 15 phospho-proteins (B) at 24 hrs time point. (C-D) Differentially expression of 108 global-proteins (C) and 36 phospho-proteins (D) at 7 DPI time point. (E-F) Differentially expression of 173 global-proteins (E) and 41 phospho-proteins (F) at 30 DPI time point. Volcano plots were generated by R statistical software. Dashed lines indicate the thresholds of  $\log_2(\text{ratio/fold change})$  and  $-\log_{10}(P)$ . The identified proteins are displayed as dots in red (up-regulation with significant changes), green (down-regulation with significant changes), or black color (no significant change).

**Supplemental Figure S2. Presentation of differentially expressed phospho-proteins by Venn diagram.**

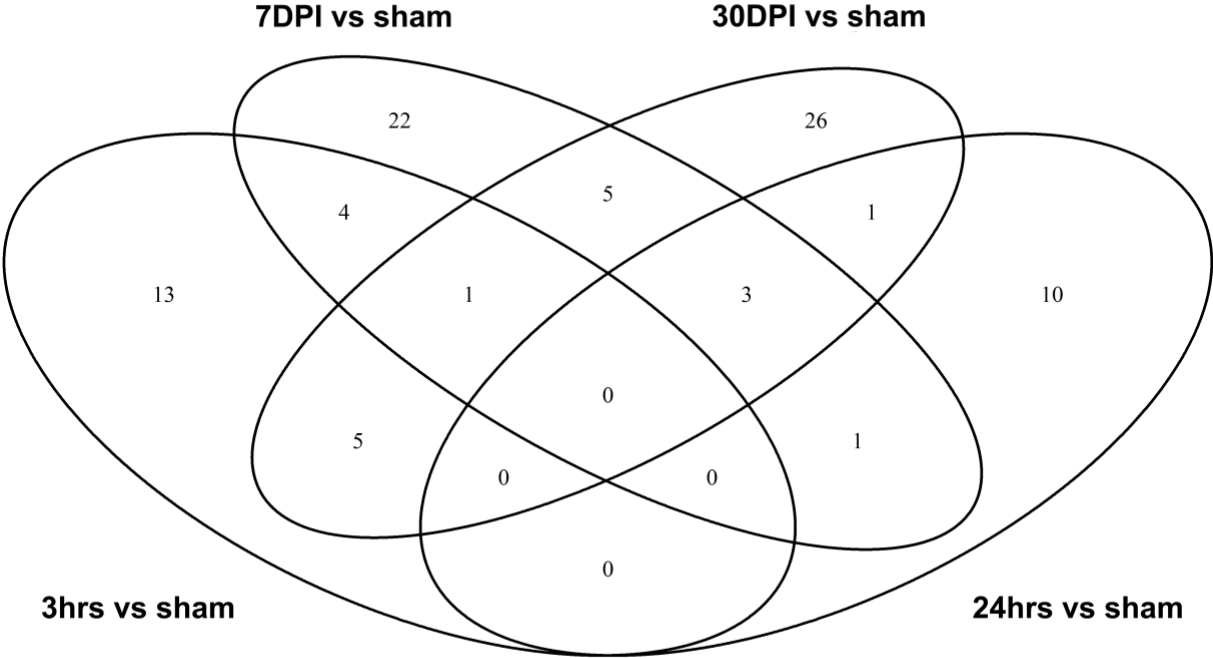

Venn diagram showing the common and distinct differentially expressed phospho-proteins among groups. The overlap portions indicate the common proteins in same region.

**Supplemental Figure S3. Strong clustering for identified phospho-proteins using principle component analysis.**

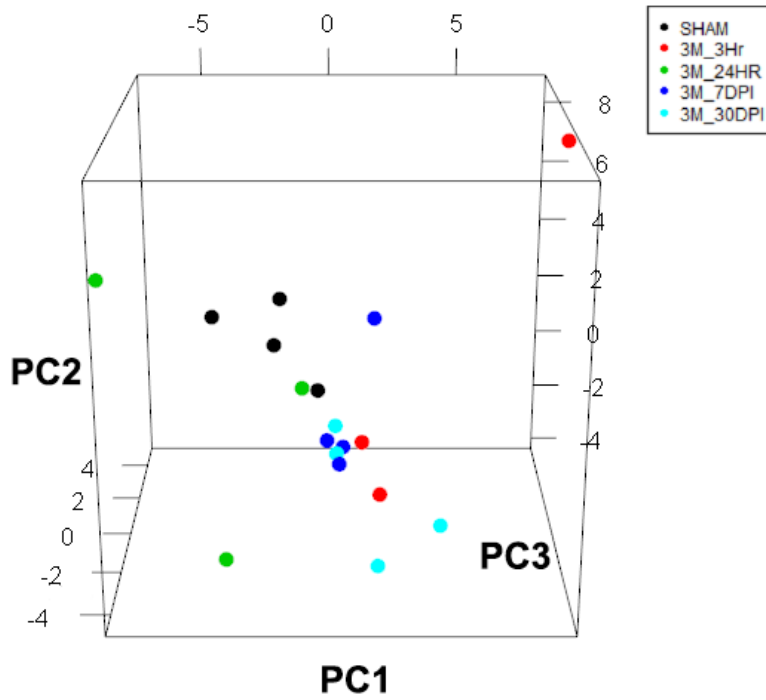

Principle component analysis showed that those differentially expressed phospho-proteins effectively separated blast at 3 hrs (red), 24 hrs (green), 7 DPI (dark blue), and 30 DPI (light blue) from sham control (black).

**Supplemental Figure S4. Top 10 GO cellular components for global-proteome after blast.**

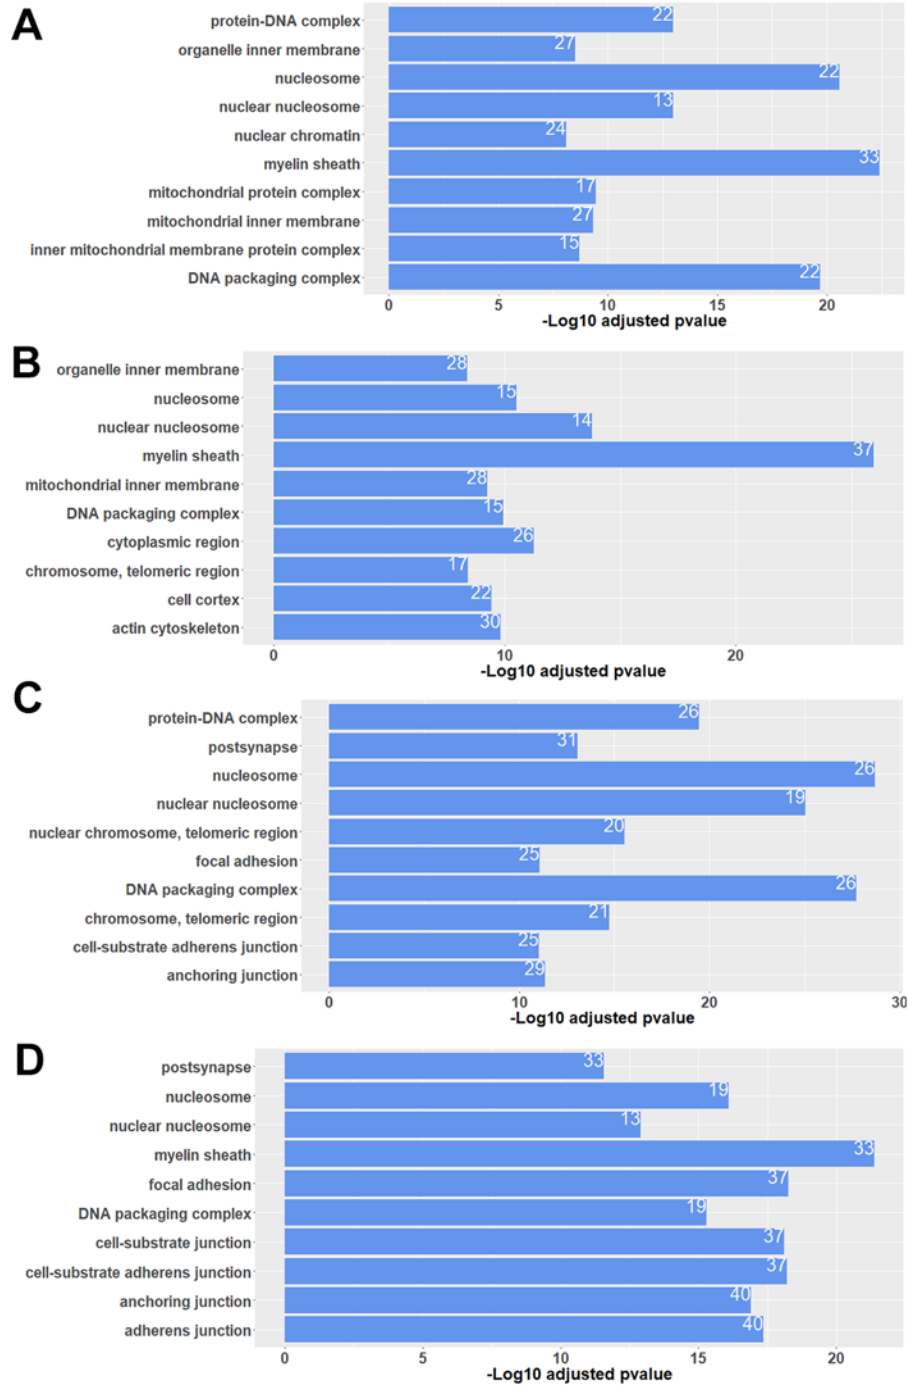

GO ontology analysis of cellular components of global-proteome at 3 hrs (A), 24 hrs (B), 7 DPI (C), and 30 DPI (D) time point after blast. Note: the number in the bar graph indicates the number of differentially expressed proteins enriched in its corresponding specific cellular component.

**Supplemental Figure S5. Top 10 GO cellular components for phospho-proteome after blast.**

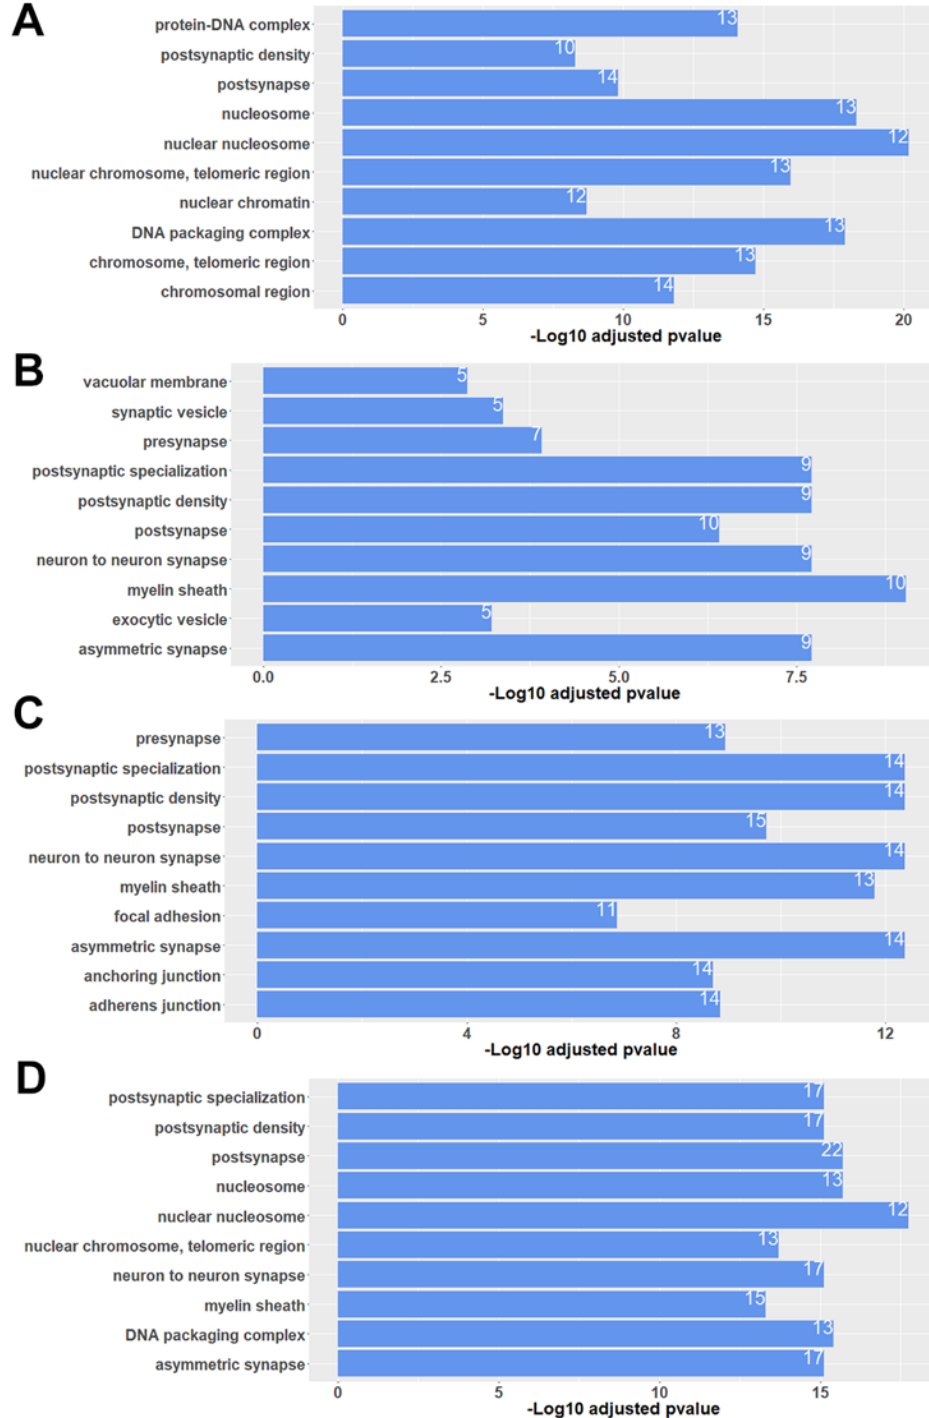

GO ontology analysis of cellular components of phospho-proteome at 3 hrs (A), 24 hrs (B), 7 DPI (C), and 30 DPI (D) time point after blast. Note: the number in the bar graph indicates the number of differentially expressed proteins enriched in its corresponding specific cellular component.

**Supplemental Figure S6. GO cellular components and signaling pathways and enriched in global proteome at 24 hrs, 7 DPI, and 30 DPI after blast injury.**

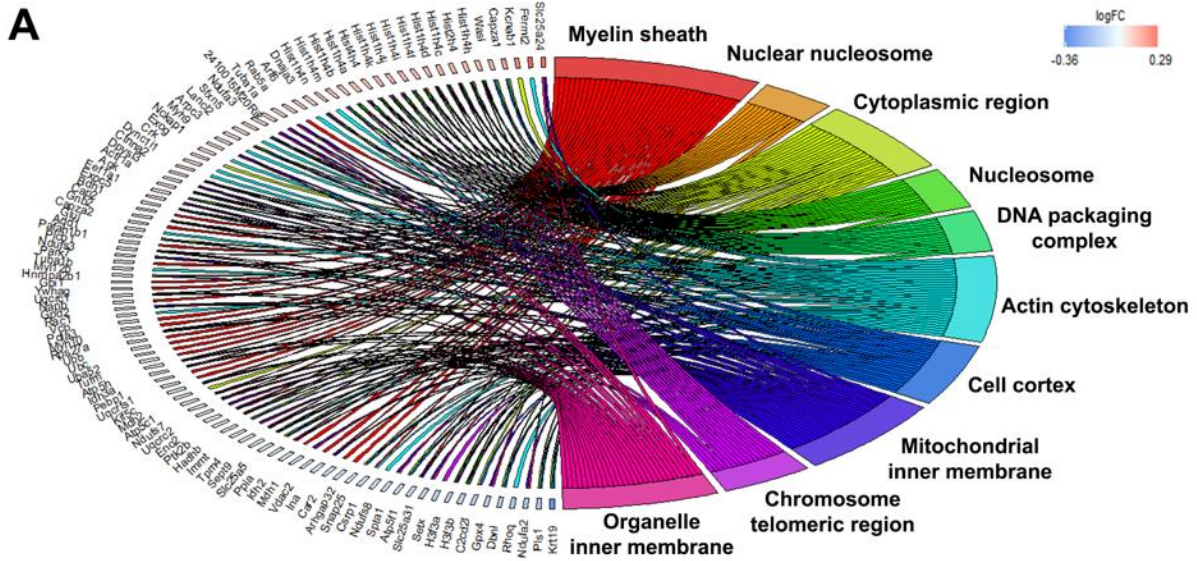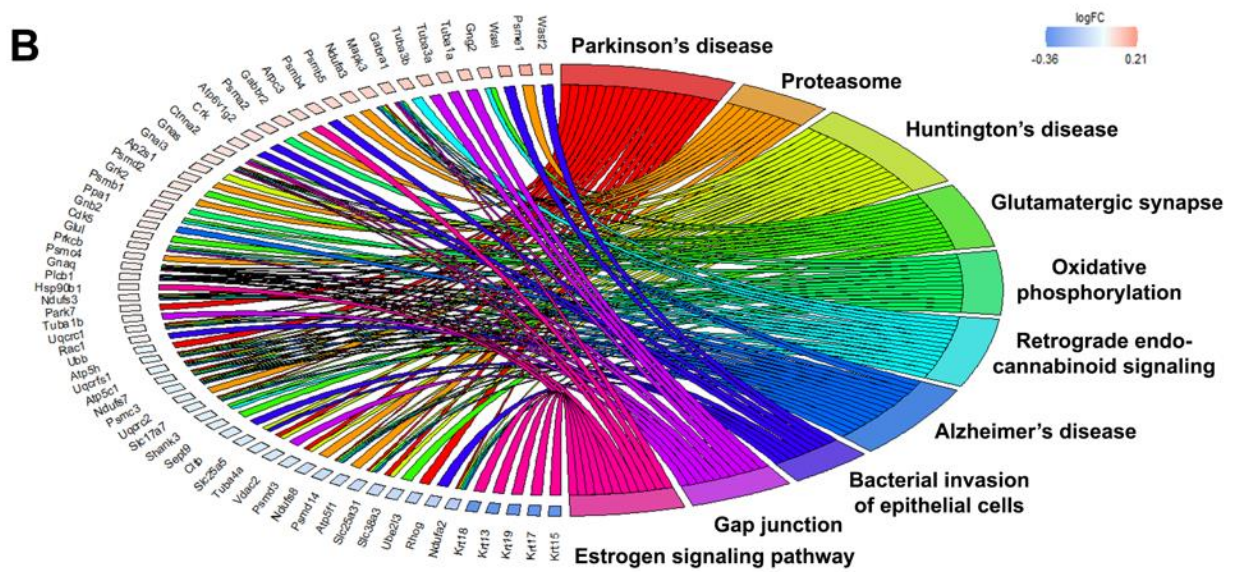

**C**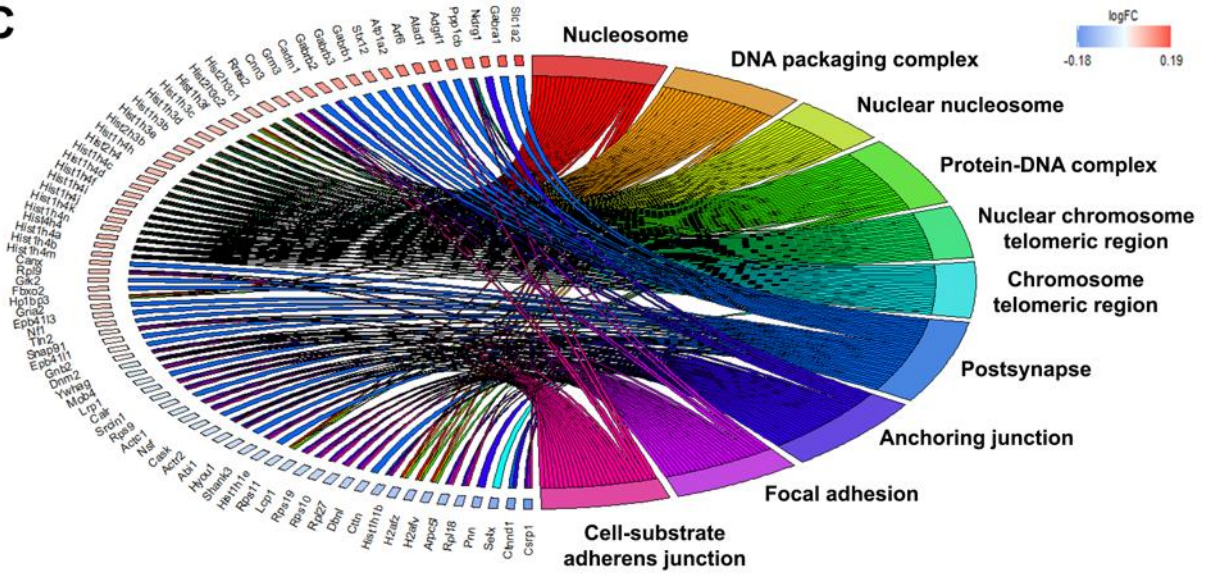**D**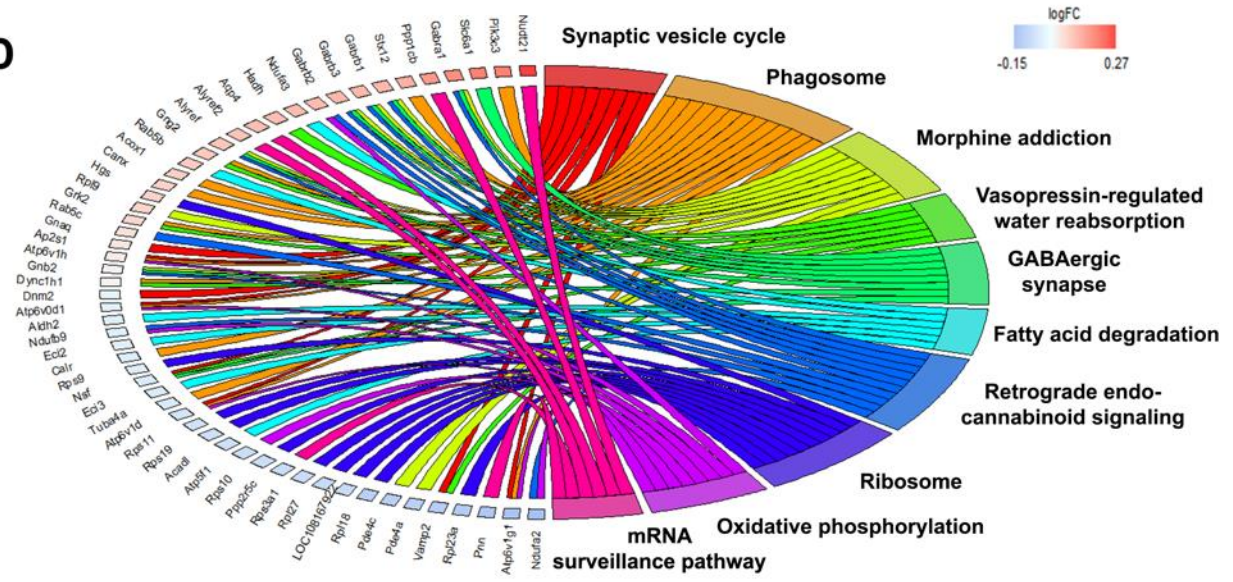



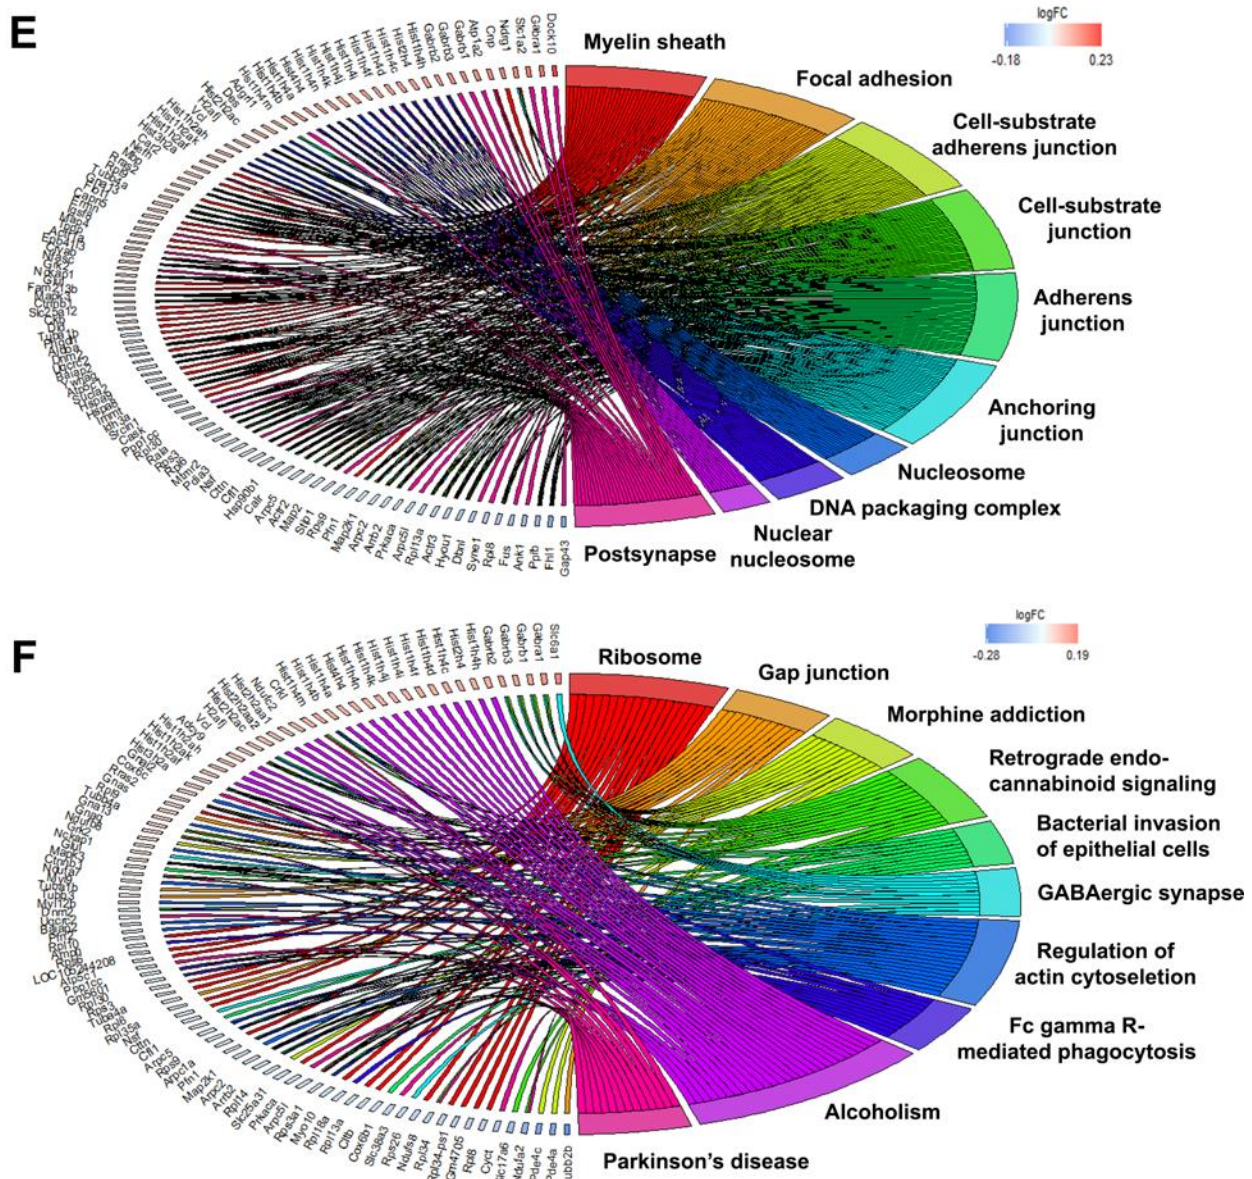

Global proteins enriched in the top shared cellular components at 24 hrs (A), 7 DPI (C), and 30 DPI (E) time points. Global proteins enriched in the top shared functional pathways at 24 hrs (B), 7 DPI (D), and 30 DPI (F) time points.

**Supplemental Figure S7. GO cellular components and signaling pathways and enriched in phospho proteome at 3 hrs, 24 hrs, 7 DPI, and 30 DPI after blast injury.**

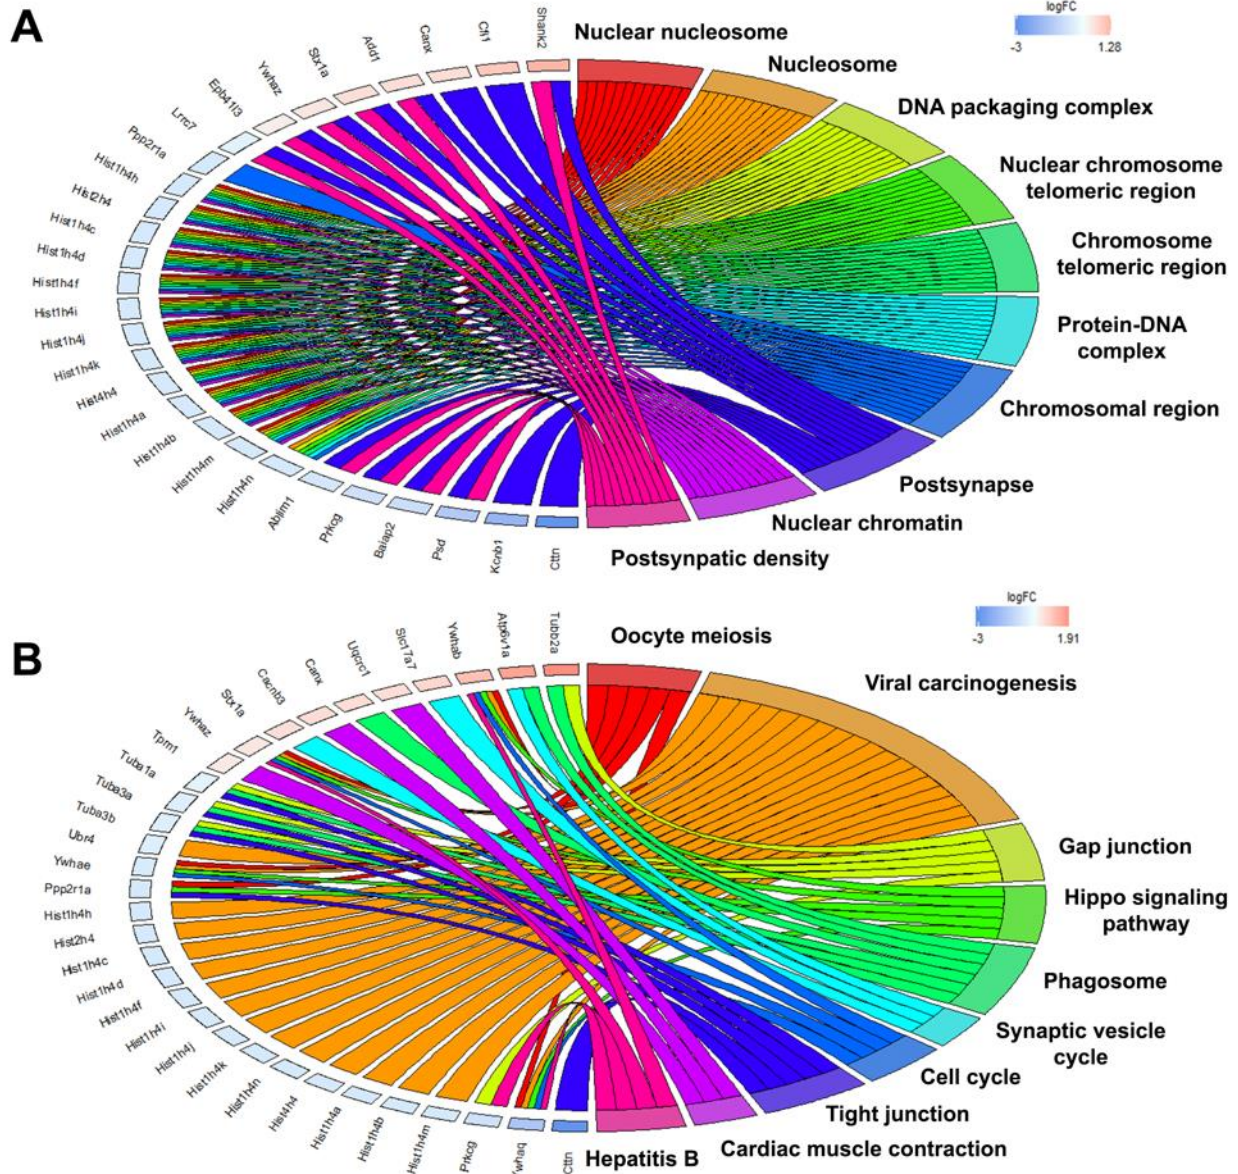

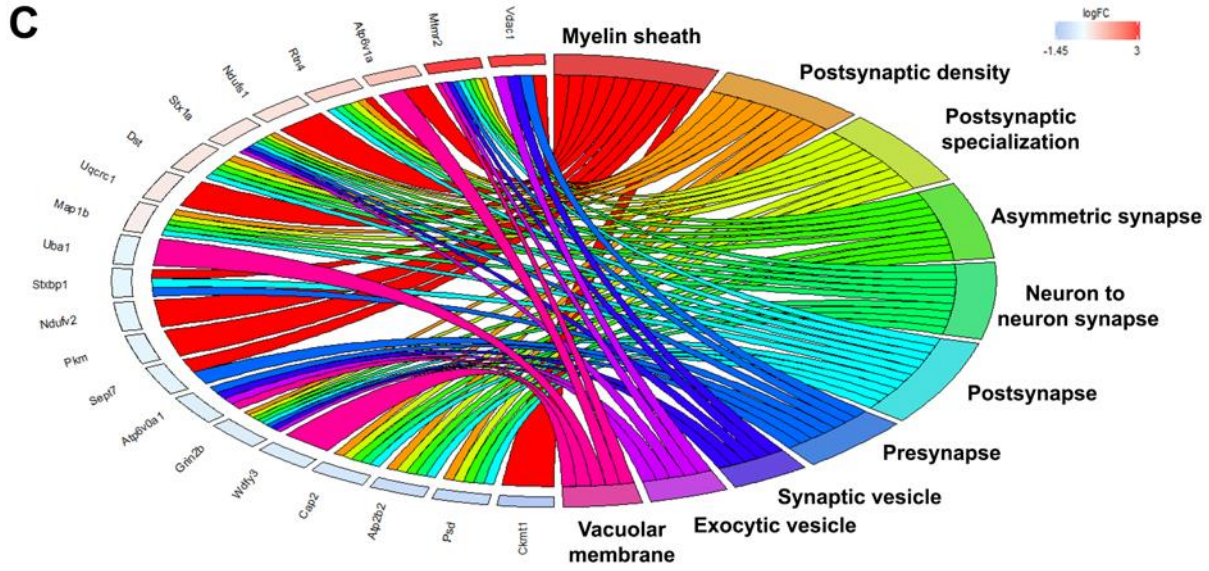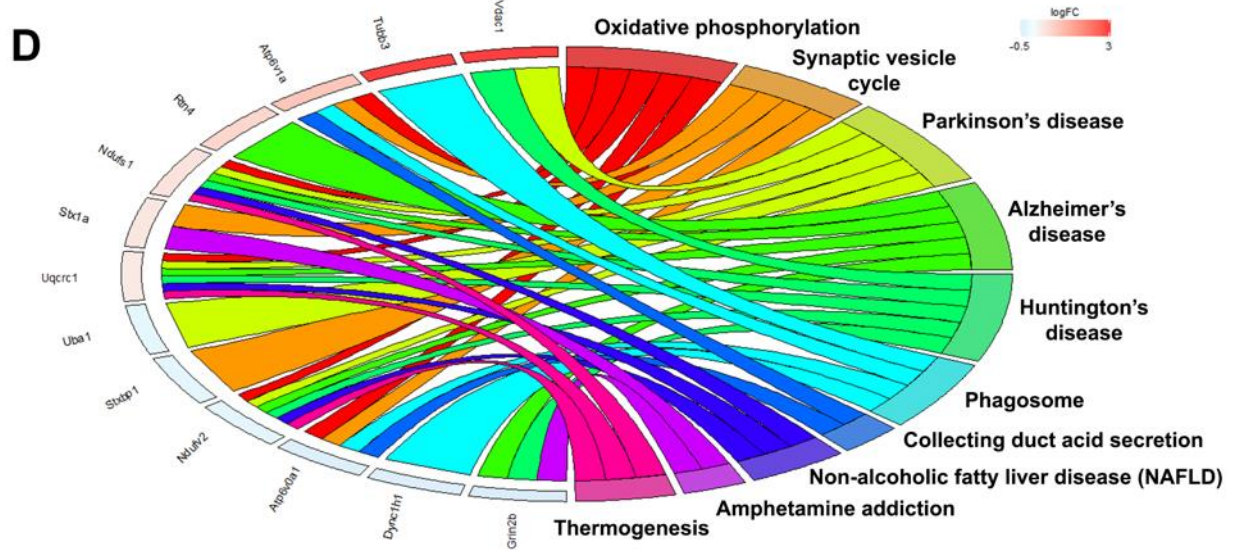

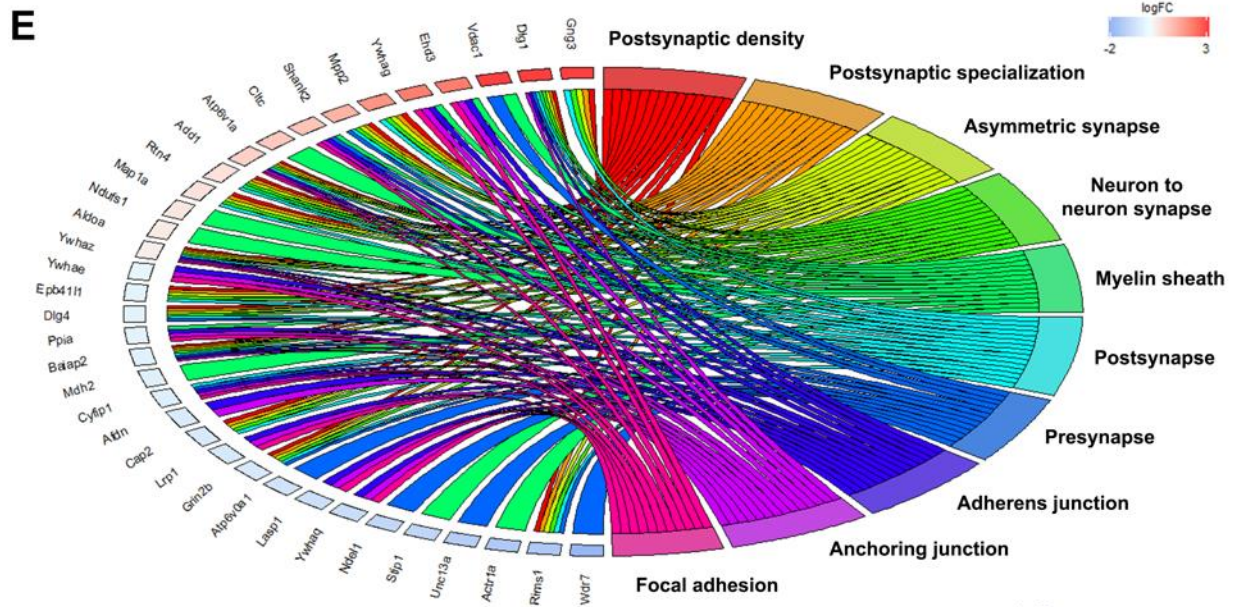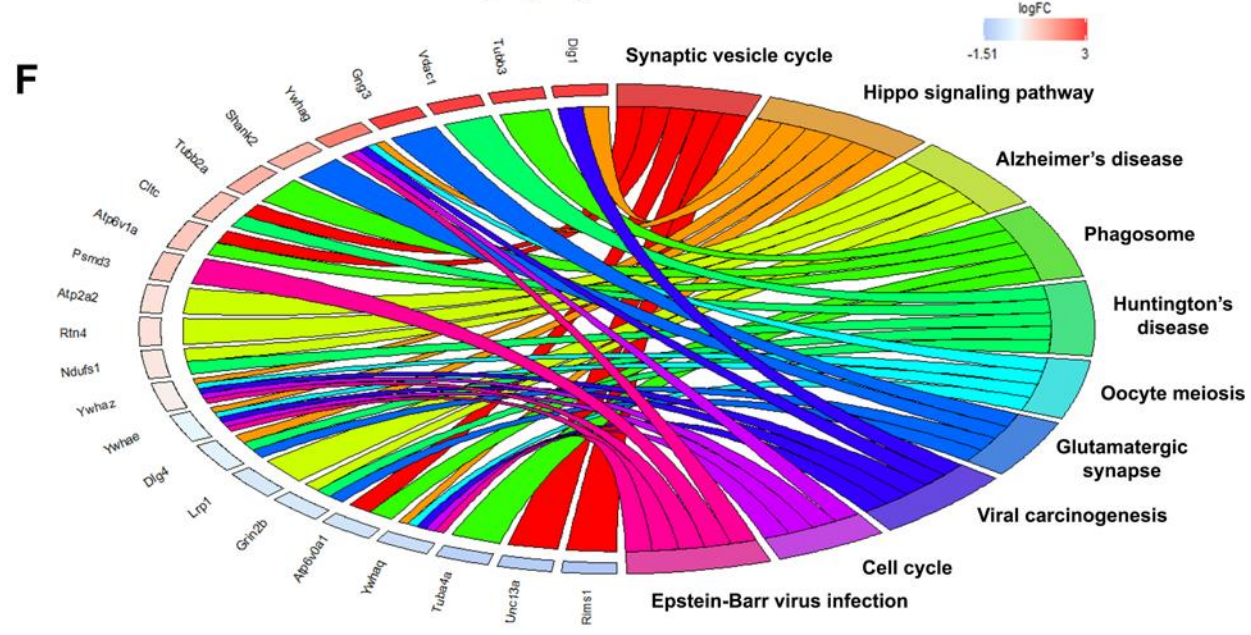

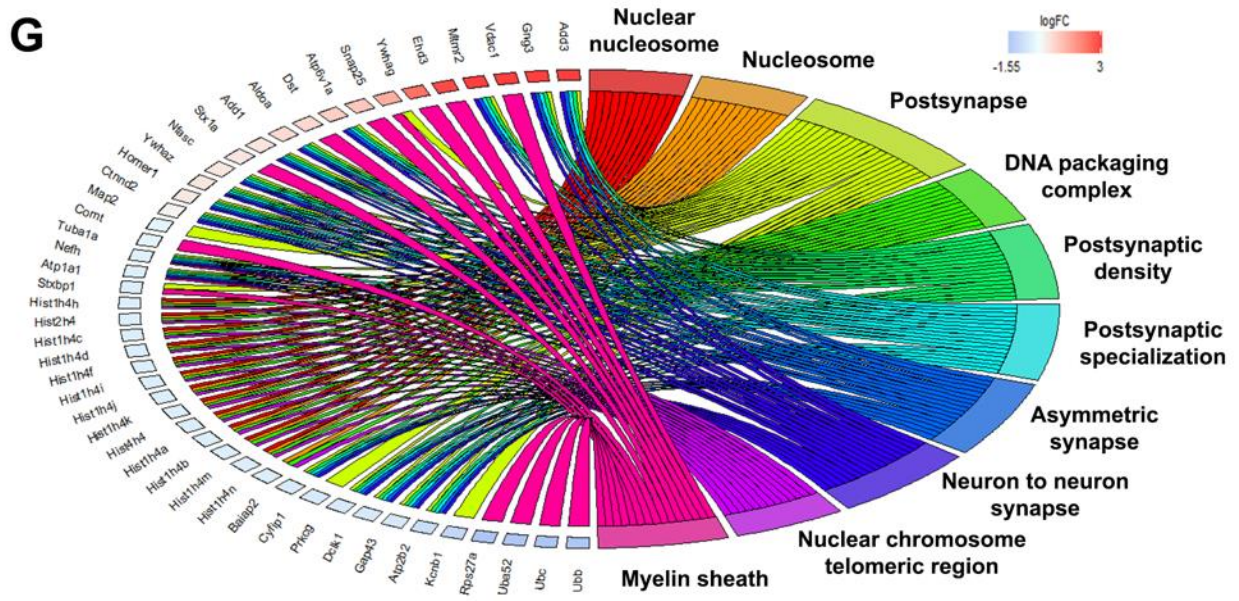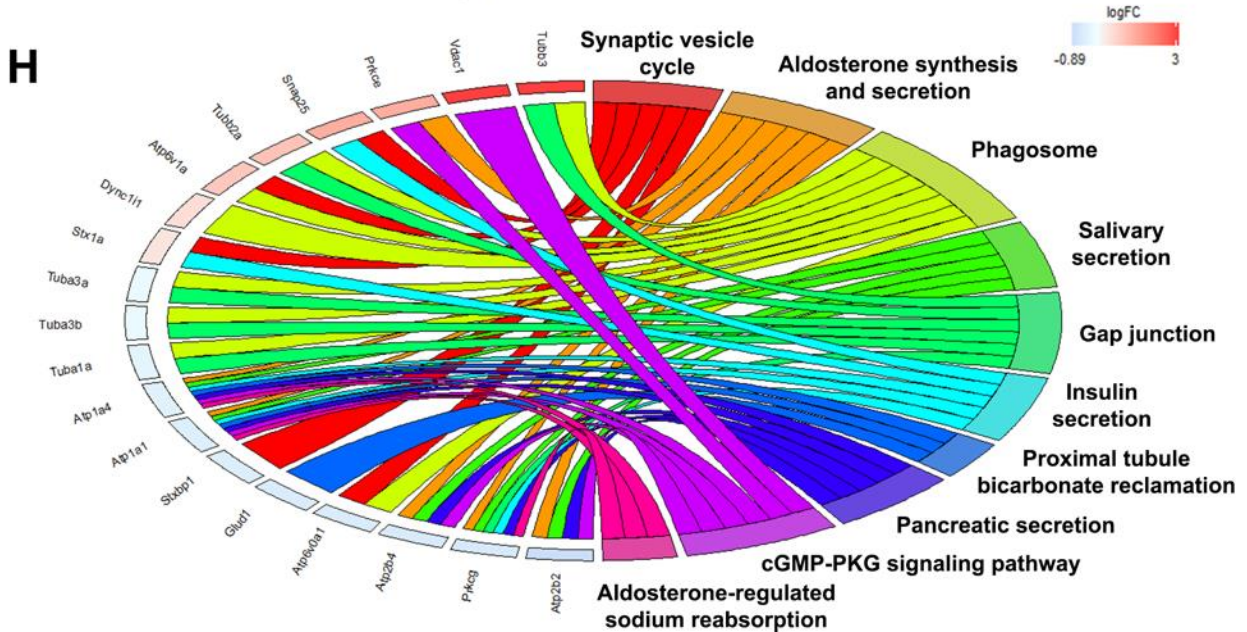

proteins enriched in the top shared cellular components at 3 hrs (A), 24 hrs (C), 7 DPI (E), and 30 DPI (G) time points. Phospho proteins enriched in the top shared functional pathways at 3 hrs (B), 24 hrs (D), 7 DPI (F), and 30 DPI (H) time points.

**Supplemental Figure S8. Top 10 canonical pathways information for global-proteome after blast.**

**A**

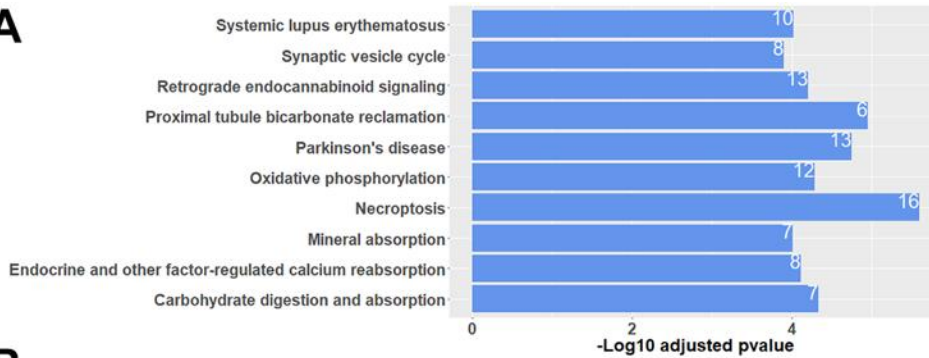

**B**

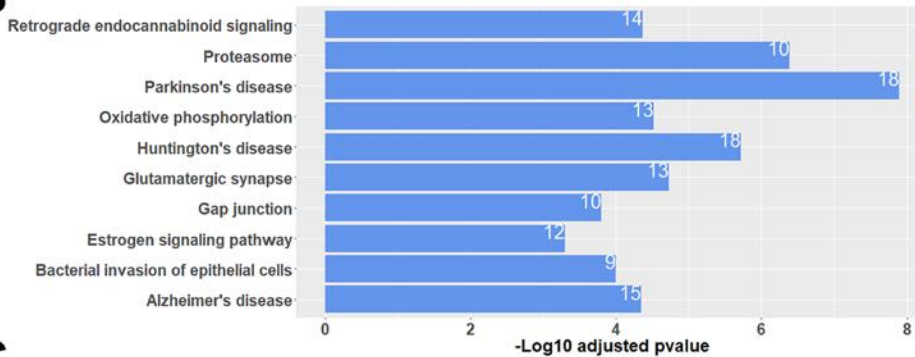

**C**

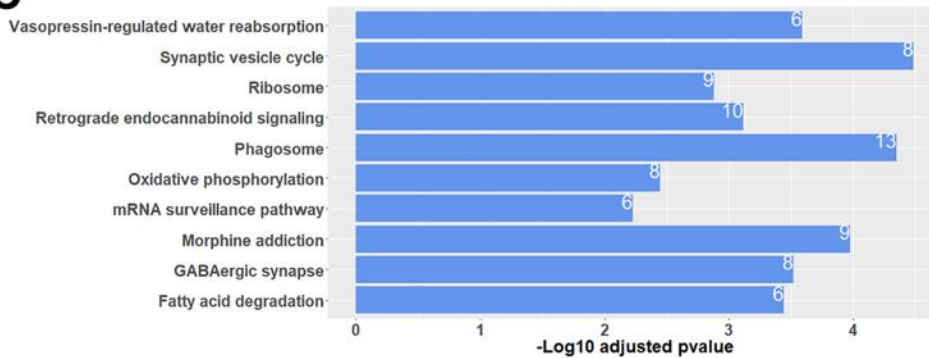

**D**

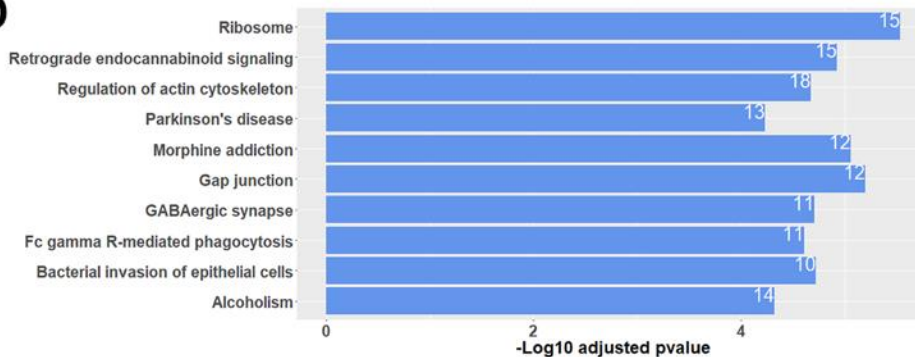

KEGG analysis of differentially expressed proteins at the global level from mouse brains at 3 hrs (A), 24 hrs (B), 7 DPI (C), and 30 DPI (D) after blast injury. Note: the number in the bar graph indicates the number of differentially expressed proteins enriched in its corresponding specific canonical signaling pathway.

**Supplemental Figure S9. Top 10 canonical pathways information for phospho-proteome after blast.**

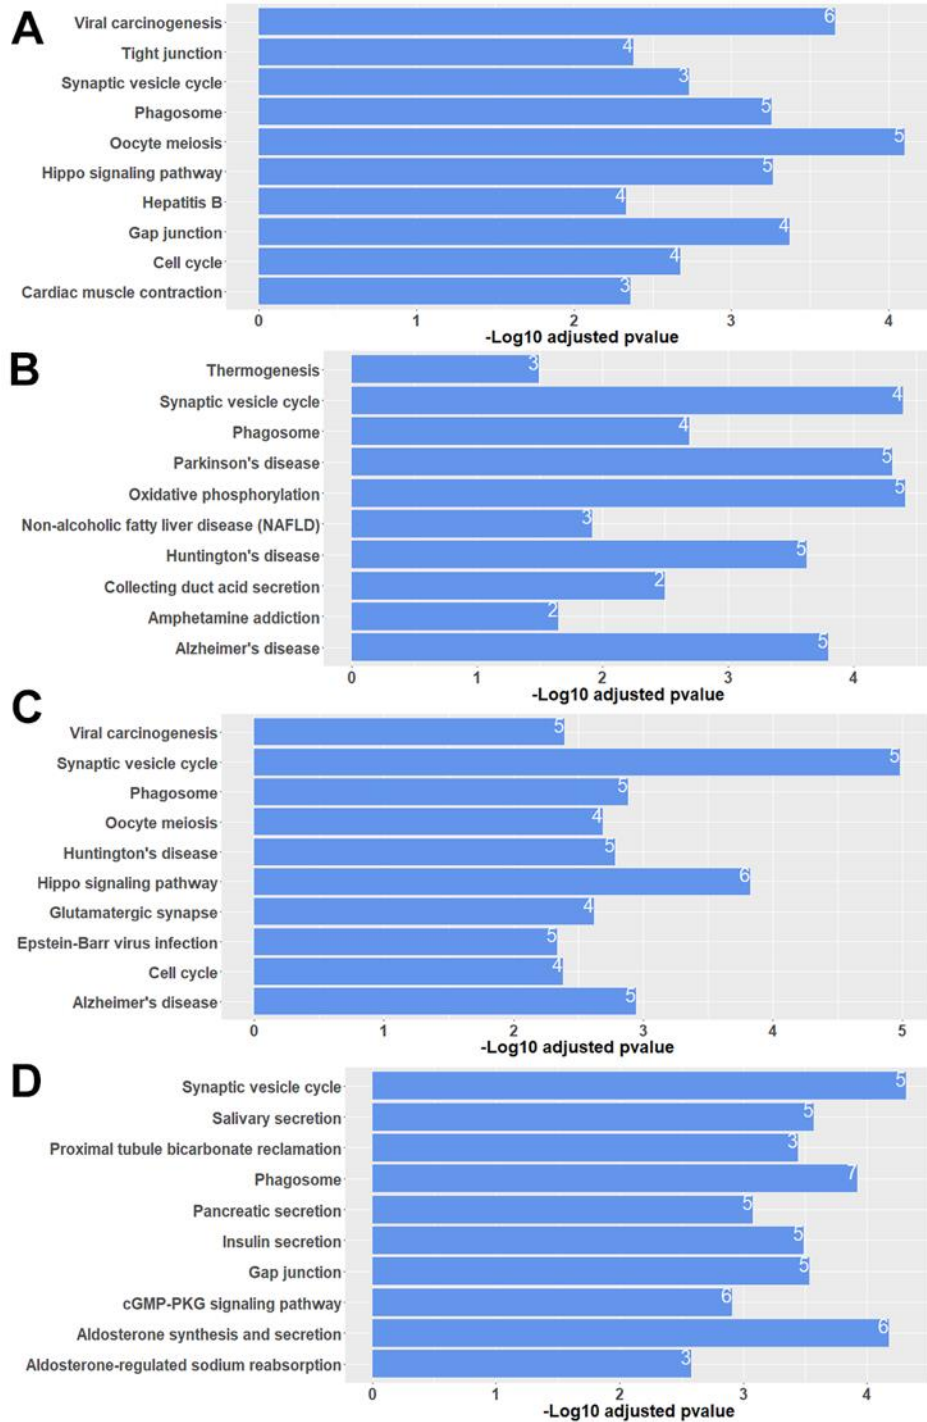

KEGG analysis of differentially expressed proteins at the phospho level from mouse brains at 3 hrs (A), 24 hrs (B), 7 DPI (C), and 30 DPI (D) after blast injury. Note: the number in the bar graph indicates the number of differentially expressed proteins enriched in its corresponding specific canonical signaling pathway.

**Supplemental Figure S10. Expression levels of mitochondrial markers of oxidative stress, fission and fusion were changed after blast.**

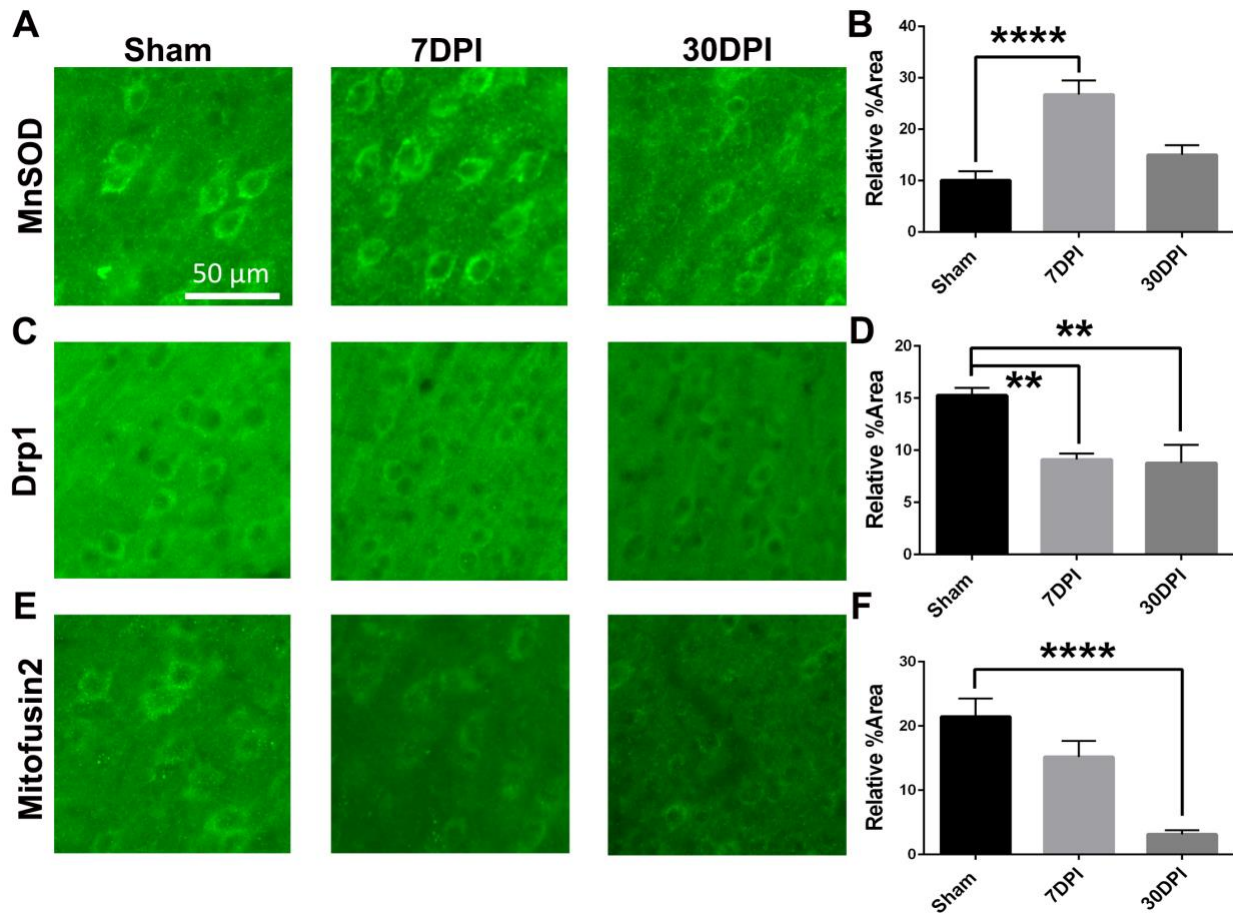

Representative images of staining were shown. (A-B) Significant increase of MnSOD staining in cortex at 7 DPI after blast as compared to sham. (C-D) Significant decreases of Drp1 staining in cortex at 7 and 30 DPI after blast as compared to sham. (E-F) Significant decrease of Mitofusin2 staining in cortex both at 30 DPI after blast as compared to sham. One-way ANOVA:  $P < 0.05$ ; Fisher's LSD test for all comparisons between two groups;  $n = 3$  in each group.



## Supplemental Tables

**Supplemental Table S1. The list of all identified proteins in global-proteome analysis after blast. Please see the attached excel file deposited to the [http://calla.rnet.missouri.edu/mass\\_spectrometry/](http://calla.rnet.missouri.edu/mass_spectrometry/); (username: gulabm706; password: SGs\$6108).**

**Supplemental Table S2. Differentially expressed protein identification in global-proteome analysis. Please see the attached excel file deposited to the [http://calla.rnet.missouri.edu/mass\\_spectrometry/](http://calla.rnet.missouri.edu/mass_spectrometry/); (username: gulabm706; password: SGs\$6108).**

**Supplemental Table S3. The list of all identified proteins in phospho-proteome analysis after blast. Please see the attached excel file deposited to the [http://calla.rnet.missouri.edu/mass\\_spectrometry/](http://calla.rnet.missouri.edu/mass_spectrometry/); (username: gulabm706; password: SGs\$6108).**

**Supplemental Table S4. Differentially expressed phosphorylated protein identification in phospho-proteome analysis. Please see the attached excel file deposited to the [http://calla.rnet.missouri.edu/mass\\_spectrometry/](http://calla.rnet.missouri.edu/mass_spectrometry/); (username: gulabm706; password: SGs\$6108).**

### Supplemental Table S5. Summary of PCA.

| Importance of Components | PC1        | PC2        | PC3        | PC4        | PC5        | PC6        | PC7       | PC8        |
|--------------------------|------------|------------|------------|------------|------------|------------|-----------|------------|
| Standard deviation       | 3.36863686 | 3.14602155 | 2.64946737 | 2.53972192 | 2.34799525 | 2.24012331 | 1.9939226 | 1.94032716 |
| Proportion of Variance   | 0.16415    | 0.14317    | 0.10154    | 0.0933     | 0.07975    | 0.07259    | 0.05751   | 0.05446    |
| Cumulative Proportion    | 0.16415    | 0.30732    | 0.40886    | 0.50217    | 0.58192    | 0.65451    | 0.71202   | 0.76648    |

| PC9        | PC10       | PC11       | PC12       | PC13      | PC14       | PC15       | PC16       | PC17       | PC18     |
|------------|------------|------------|------------|-----------|------------|------------|------------|------------|----------|
| 1.81462685 | 1.72179068 | 1.49318375 | 1.42347336 | 1.2529383 | 1.19744132 | 1.13153271 | 1.02454647 | 0.54431378 | 1.81E-15 |
| 0.04763    | 0.04288    | 0.03225    | 0.02931    | 0.02271   | 0.02074    | 0.01852    | 0.01518    | 0.00429    | 0        |
| 0.81411    | 0.857      | 0.88925    | 0.91856    | 0.94127   | 0.96201    | 0.98053    | 0.99571    | 1          | 1        |

Principal components were ranked based on the proportion of variance they accounted in the dataset.

**Supplemental Table S6. Canonical pathways information for global-proteome at different time points after blast. Please see the attached excel file deposited to the [http://calla.rnet.missouri.edu/mass\\_spectrometry/](http://calla.rnet.missouri.edu/mass_spectrometry/); (username: gulabm706; password: SGs\$6108).**

**Supplemental Table S7. Canonical pathways information for phospho-proteome at different time points after blast. Please see the attached excel file deposited to the [http://calla.rnet.missouri.edu/mass\\_spectrometry/](http://calla.rnet.missouri.edu/mass_spectrometry/); (username: gulabm706; password: SGs\$6108).**

**Supplemental Table S8. Cross comparison of the canonical pathways among groups by IPA analysis. Please see the attached excel file deposited to the [http://calla.rnet.missouri.edu/mass\\_spectrometry/](http://calla.rnet.missouri.edu/mass_spectrometry/); (username: gulabm706; password: SGs\$6108).**

**Supplemental Table S9. KEGG annotation of canonical pathways from phospho-proteome associated with oxidative stress and mitochondrial dysfunction after blast injury.**

| Canonical pathway |                           | Differentially expressed proteins |                 |                   |          |
|-------------------|---------------------------|-----------------------------------|-----------------|-------------------|----------|
| ID                | Name                      | 3hrs                              | 24hrs           | 7DPI              | 30DPI    |
| mmu00190          | Oxidative phosphorylation | Uqcrc1                            | Atp6v1a, Ndufv2 | Atp6v1a, Atp6v0a1 | Atp6v1a  |
|                   |                           | 3.80E-05                          | 4.68E-02        | 8.71E-02          | 2.11E-02 |
| mmu04137          | Mitophagy                 | NA                                | NA              | NA                | Ubb      |
|                   |                           | 1.00E+00                          | 3.62E-01        | 1.00E+00          | 1.00E+00 |
| mmu04142          | Lysosome                  | NA                                | Atp6v0a1        | Atp6v0a1          | NA       |
|                   |                           | 3.52E-01                          | 2.18E-01        | 1.00E+00          | 1.35E-01 |
| mmu04145          | Phagosome                 | NA                                | Atp6v1a         | Tubb3, Atp6v1a    | Atp6v1a  |
|                   |                           | 2.00E-03                          | 1.16E-04        | 5.44E-04          | 1.29E-03 |
| mmu04150          | mTOR signaling pathway    | NA                                | Atp6v1a         | Atp6v1a           | Atp6v1a  |
|                   |                           | 4.08E-01                          | 2.85E-01        | 2.62E-02          | 5.44E-01 |
| mmu04210          | Apoptosis                 | Tuba1a, Tuba3a                    | NA              | NA                | Tuba1a   |
|                   |                           | 1.00E+00                          | 2.72E-01        | 1.29E-01          | 5.32E-01 |

(Note: P values are presented directly under each pathway at different time points. NA: no differentially expressed protein is identified)

**Supplemental Table S10. KEGG annotation of canonical pathways from global-proteome associated with myelin sheath and axonal injury after blast injury.**

| Canonical pathway |                           | Differentially expressed proteins |                 |                   |          |
|-------------------|---------------------------|-----------------------------------|-----------------|-------------------|----------|
| ID                | Name                      | 3hrs                              | 24hrs           | 7DPI              | 30DPI    |
| mmu00190          | Oxidative phosphorylation | Uqcrc1                            | Atp6v1a, Ndufv2 | Atp6v1a, Atp6v0a1 | Atp6v1a  |
|                   |                           | 3.80E-05                          | 4.68E-02        | 8.71E-02          | 2.11E-02 |
|                   | Mitophagy                 | NA                                | NA              | NA                | Ubb      |

|              |                              |                   |          |                   |          |
|--------------|------------------------------|-------------------|----------|-------------------|----------|
| mmu041<br>37 |                              | 1.00E+00          | 3.62E-01 | 1.00E+00          | 1.00E+00 |
| mmu041<br>42 | Lysosome                     | NA                | Atp6v0a1 | Atp6v0a1          | NA       |
|              |                              | 3.52E-01          | 2.18E-01 | 1.00E+00          | 1.35E-01 |
| mmu041<br>45 | Phagosome                    | NA                | Atp6v1a  | Tubb3,<br>Atp6v1a | Atp6v1a  |
|              |                              | 2.00E-03          | 1.16E-04 | 5.44E-04          | 1.29E-03 |
| mmu041<br>50 | mTOR<br>signaling<br>pathway | NA                | Atp6v1a  | Atp6v1a           | Atp6v1a  |
|              |                              | 4.08E-01          | 2.85E-01 | 2.62E-02          | 5.44E-01 |
| mmu042<br>10 | Apoptosis                    | Tuba1a,<br>Tuba3a | NA       | NA                | Tuba1a   |
|              |                              | 1.00E+00          | 2.72E-01 | 1.29E-01          | 5.32E-01 |

**Supplemental Table S11. KEGG annotation of canonical pathways from global-proteome associated with synaptic dysregulation after blast injury.**

| Canonical pathway |                              | Differentially expressed proteins |                    |                      |                    |
|-------------------|------------------------------|-----------------------------------|--------------------|----------------------|--------------------|
| ID                | Name                         | 3hrs                              | 24hrs              | 7DPI                 | 30DPI              |
| mmu047<br>21      | Synaptic<br>vesicle<br>cycle | NA                                | Stxbp1,<br>Atp6v1a | Atp6v1a,<br>Atp6v0a1 | Stxbp1,<br>Atp6v1a |
|                   |                              | 3.96E-05                          | 4.75E-05           | 1.84E-03             | 1.02E-05           |
| mmu047<br>27      | GABAergic<br>synapse         | Prkcg                             | NA                 | Gng3                 | Prkcg, Gng3        |
|                   |                              | 1.00E+00                          | 1.05E-01           | 4.44E-02             | 3.35E-01           |
| mmu047<br>24      | Glutamatergic<br>synapse     | NA                                | NA                 | Grin2b               | NA                 |
|                   |                              | 3.17E-01                          | 4.18E-02           | 1.14E-02             | 2.37E-03           |
| mmu047<br>20      | Long-term<br>potentiation    | NA                                | NA                 | Grin2b               | NA                 |
|                   |                              | 2.07E-01                          | 3.77E-01           | 2.51E-01             | 2.93E-01           |
| mmu047<br>30      | Long-term<br>depression      | Prkcg                             | NA                 | NA                   | Prkcg              |
|                   |                              | 1.00E+00                          | 3.65E-01           | 3.09E-02             | 1.00E+00           |

**References:**

1. Song, H., Konan, L.M., Cui, J., Johnson, C.E., Langenderfer, M., Grant, D., Ndam, T., Simonyi, A., White, T., Demirci, U., Mott, D.R., Schwer, D., Hubler, G.K., Cernak, I., DePalma, R.G. and Gu, Z. (2018). Ultrastructural brain abnormalities and associated behavioral changes in mice after low-intensity blast exposure. *Behav Brain Res* 347, 148-157.
